# Supplementary material for: Droplet Merging on a Lab-on-a-Chip Platform by Uniform Magnetic Fields
Source: PubMed Central journal article supplement (PMC5124862; doi:10.1038/srep37671), 2016-11-28
Supplement: srep37671-s1.pdf [file srep37671-s1.pdf]

# Supplementary Information

## Droplet Merging on a Lab-on-a-Chip Platform by Uniform Magnetic Fields

V. B. Varma<sup>1+</sup>, A. Ray<sup>1</sup>, Z. M. Wang<sup>1</sup>, Z. P. Wang<sup>2</sup> and R. V. Ramanujan<sup>1\*\*</sup>

<sup>1</sup>School of Materials Science and Engineering, Nanyang Technological University, Singapore, 639798.

<sup>2</sup>Singapore Institute of Manufacturing Technology, 71 Nanyang Dr, Singapore 638075.

\*Corresponding Author Electronic mail: [ramanujan@ntu.edu.sg](mailto:ramanujan@ntu.edu.sg)

### Content:

S1. Simulation Results of Dependence of Lm on Resultant Interfacial Tension

S2. Video of Experimental and Simulated Droplet Merging on Lab-on-a-Chip Platform by Uniform Magnetic Fields

### S1. Simulation Results of Dependence of Lm on Resultant Interfacial Tension

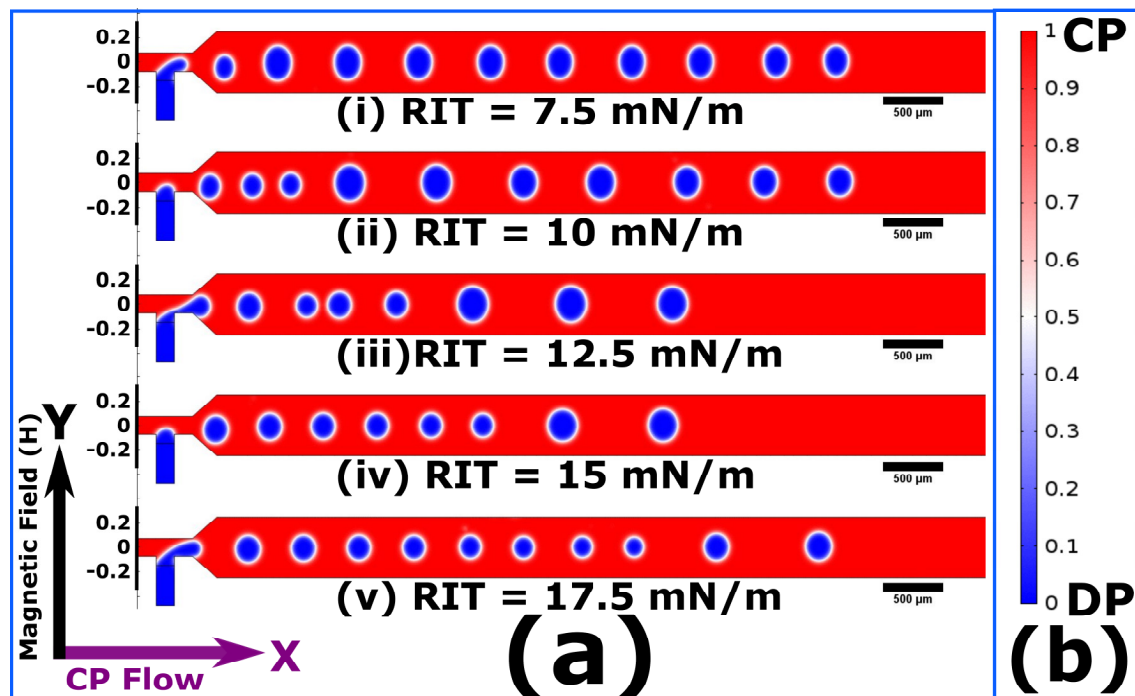

Supplementary Figure 1: Simulation results (a) The dependence of droplet merging distance  $L_m$  on *resultant interfacial tension* (RIT) at magnetic field  $H=500$  mT (in the y-direction) and flow rate ratio  $Q_r=3$ . The flow of the CP was in the x-direction. The scale is in mm. Scale bar= $500 \mu\text{m}$ . (b) Colour bar for supplementary Figure1(a). Where, CP (red colour) and DP (blue colour) denote the continuous phase of oil and the dispersed phase of the ferrofluid, respectively. At  $\text{RIT} \leq 20$  mN/m merging was observed. Droplet merging distance,  $L_m$  increases with increasing RIT value.

---

## **S 2. Video of Experimental and Simulated Droplet Merging on a Lab-on-a-Chip Platform by Uniform Magnetic Fields**

**Video Legend:**

**S2**

**Video Title:**

**Droplet Merging on a Lab-on-a-Chip Platform by Uniform Magnetic Fields**

**Video Description:**

As shown in the video:

- (i) When the magnetic field was not applied, no droplet merging occurs at flow rate ratio of 2 (Q2) and multi-droplet merging occurs at flow rate ratio of 5 (Q5).
  - (ii) When a uniform magnetic field  $H=500$  mT was applied, Two Droplet Merging (TDM) occurs at both flow rate ratios, Q2 and Q5. Droplet merging length ( $L_m$ ) is controlled by the flow rate ratios and applied magnetic fields.
  - (iii) The droplet merging length,  $L_m$  also shows a dependence on the ferrofluid-oil *resultant interfacial tension* (RIT). The simulation results demonstrate the increasing merging length  $L_m$ , with the increasing RIT values, at a constant flow rate ratio of 3 (Q3) and an applied magnetic field,  $H=500$  mT.
-
